# Supplementary material
Source: Springer Nature journal article supplement (https://www.springermedizin.de/resource/supplementary/12933_2005_54_MOESM1_ESM.pdf/9539528)

## Non-Diabetic and Diabetic Heart Rates

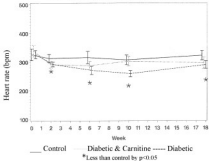

Supplement: MOESM1 [file 9539528]
